# Supplementary material for: Clinical outcome using a modified treat-and-extend protocol for neovascular age-related macular degeneration
Source: HighWire-hosted journal article supplement (doi:10.1136/bmjophth-2022-001180), 2022-12-01
Supplement: bmjophth-2022-001180supp001_data_supplement.pdf [file bmjophth-2022-001180supp001_data_supplement.pdf]

**Supplementary Table 1: Overview of patient characteristics in the treat-and-extend (T&E) and modified treat-and-extend (mT&E) groups.**

|                                                 | <b>T&amp;E group<br/>(n=116 patients)</b> | <b>mT&amp;E group<br/>(n=94 patients)</b> |
|-------------------------------------------------|-------------------------------------------|-------------------------------------------|
| <b>Female</b>                                   | 48 (41.4)                                 | 52 (55.3)                                 |
| <b>Male</b>                                     | 68 (58.6)                                 | 42 (46.8)                                 |
| <b>Mean age <math>\pm</math> SD, years</b>      | 76.9 $\pm$ 7.8                            | 79.8 $\pm$ 6.8                            |
| <b>&lt;70 years</b>                             | 22 (19.0)                                 | 6 (6.4)                                   |
| <b>70-80 years</b>                              | 52 (44.8)                                 | 43 (45.7)                                 |
| <b>&gt;80 years</b>                             | 42 (36.2)                                 | 45 (47.9)                                 |
| <b>Hypertension</b>                             | 74 (54.8)                                 | 57 (60.6)                                 |
| <b>Diabetes mellitus</b>                        | 26 (19.3)                                 | 32 (34.0)                                 |
| <b>Ischemic heart disease</b>                   | 30 (22.2)                                 | 25 (26.6)                                 |
| <b>Hyperlipidemia/<br/>hypercholesterolemia</b> | 39 (33.6)                                 | 39 (41.5)                                 |
| <b>Kidney disease</b>                           | 2 (1.7)                                   | 11 (11.7)                                 |
| <b>Glaucoma</b>                                 | 12 (10.3)                                 | 14 (14.9)                                 |

Except where indicated otherwise, data are presented as n (%).
